# Supplementary material for: Effects of various π-conjugated spacers in thiadiazole[3,4-c]pyridine-cored panchromatic organic dyes for dye-sensitized solar cells
Source: Royal Society of Chemistry journal article supplement (doi:10.1039/c4ta05350h), 2014-12-09
Supplement: c4ta05350h1.pdf [file c4ta05350h1.pdf]

**Effects of Various  $\pi$ -Conjugated Spacers in Thiadiazole[3,4-  
c]pyridine-Cored Panchromatic Organic Dyes for Dye-Sensitized  
Solar Cells**

**Yong Hua,<sup>\$a</sup> Jian He,<sup>\$b</sup> Caishun Zhang,<sup>c</sup> Chunjiang Qin,<sup>d</sup> Liyuan Han,<sup>d</sup> Jianzhang Zhao,<sup>c</sup>  
Tao Chen,<sup>\*b</sup> Wai-Yeung Wong,<sup>\*a</sup>, Wai-Kwok Wong<sup>\*a</sup> and Xunjin Zhu,<sup>\*a</sup>**

**Contents**

- i. Figures
- ii. Tables

**Table S1.** Photovoltaic parameters of a batch of five devices with Y4 measured under AM 1.5 G illuminations.

| Devices | $J_{sc} / \text{mA} \cdot \text{cm}^{-2}$ | $V_{oc} / \text{V}$ | $FF$              | $\eta/\%$       |
|---------|-------------------------------------------|---------------------|-------------------|-----------------|
| 1       | 12.54                                     | 0.749               | 0.671             | 6.30            |
| 2       | 12.14                                     | 0.769               | 0.654             | 6.11            |
| 3       | 12.18                                     | 0.762               | 0.649             | 6.03            |
| 4       | 12.32                                     | 0.739               | 0.655             | 6.19            |
| 5       | 12.40                                     | 0.740               | 0.673             | 6.27            |
| Average | $12.32 \pm 0.16$                          | $0.752 \pm 0.013$   | $0.660 \pm 0.011$ | $6.18 \pm 0.11$ |

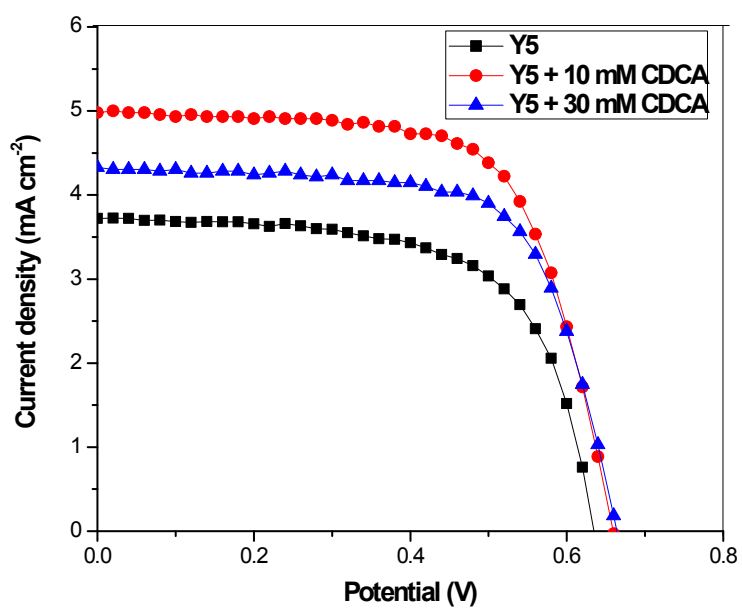

**Figure S1.** The  $J$ - $V$  curves of Y5 and CDCA sensitized solar cells.

**Table S2.** Photovoltaic parameters of **Y5** with co-adsorbent CDCA concentrations.

| Dye                    | $J_{sc} / \text{mA} \cdot \text{cm}^{-2}$ | $V_{oc} / \text{V}$ | $FF$  | $\eta/\%$ |
|------------------------|-------------------------------------------|---------------------|-------|-----------|
| <b>Y5</b>              | 3.72                                      | 0.635               | 0.619 | 1.46      |
| <b>Y5 + 10 mM CDCA</b> | 4.98                                      | 0.658               | 0.643 | 2.11      |
| <b>Y5 + 30 mM CDCA</b> | 4.33                                      | 0.664               | 0.658 | 1.89      |
